# Supplementary material for: Quantitative monitoring of circulating tumor DNA predicts response of cutaneous metastatic melanoma to anti-PD1 immunotherapy
Source: PubMed Central journal article supplement (PMC5982743; doi:10.18632/oncotarget.25404), 2018-05-18
Supplement: oncotarget-09-25265-s001.pdf [file oncotarget-09-25265-s001.pdf]

## Quantitative monitoring of circulating tumor DNA predicts response of cutaneous metastatic melanoma to anti-PD1 immunotherapy

### SUPPLEMENTARY MATERIALS

Supplementary Table 1: References of the oligonucleotide probes used for dPCR analysis

| Gene | Mutation | Reference*       | Patients ( <i>n</i> ) | Wild type allele (VIC) | Mutant allele (FAM) |    |
|------|----------|------------------|-----------------------|------------------------|---------------------|----|
| BRAF | p.V600E  | c.1799T>A        | AH6R5PH               | 21                     | A                   | T  |
|      | p.V600K  | c.1798_1799GT>AA | AHBKFRM               | 3                      | AC                  | TT |
|      | p.G12D   | c.35G>A          | AHI15D6               | 1                      | C                   | T  |
| NRAS | p.Q61K   | c.181C>A         | AH1SDFJ               | 10                     | G                   | T  |
|      | p.Q61L   | c.182A>T         | AHD2CUE               | 1                      | T                   | A  |
|      | p.Q61R   | c.182A>G         | AHS1P6Q               | 17                     | T                   | C  |

\*Applied Biosystems Thermo Fisher Scientific.
